# Supplementary material
Source: PubMed Central journal article supplement (PMC9593319)
Supplement: jamaoncol-e224319-s001.pdf [file jamaoncol-e224319-s001.pdf]

## Supplemental Online Content

Bryant AK, Lee KM, Alba PR, et al. Association of prostate-specific antigen screening rates with subsequent metastatic prostate cancer incidence at US Veterans Health Administration Facilities. *JAMA Oncol*. Published online October 24, 2022. doi:10.1001/jamaoncol.2022.4319

### **eMethods.**

**eFigure 1.** Characteristics of 128 Veterans Healthcare Administration Facilities Included in the Primary Analysis

**eFigure 2.** Pooled PSA Screening, Prostate Biopsy, and Prostate Cancer Incidence Rates

**eTable 1.** Screening and Diagnosis Rates by Age Group

**eTable 2.** Screening and Diagnosis Rates by Race

**eTable 3.** Results of Mixed Effects Negative Binomial Regressions for Metastatic Pca Rates Among Frequent Veterans Healthcare Administration Users

This supplemental material has been provided by the authors to give readers additional information about their work.

## eMethods.

### Natural language processing for Gleason score.

We developed a rule-based natural language processing (NLP) system to extract Gleason scores from clinical documents, including pathological reports from prostate specimens and reporting of pathological results in other cancer-related clinical notes, including clinical notes from Oncology, Radiation Oncology, Urology, and chemotherapy infusion providers. The NLP system extracted the highest reported Gleason score from each document. The system was evaluated with two validation studies. First, performance was assessed on 200 randomly selected pathology documents involving a prostate specimen. The system showed excellent performance, with an accuracy of 0.995, recall of 1.0, and precision of 0.988.

**Tables.** Results of Gleason NLP algorithm validation on 200 randomly selected Pathology documents involving a prostate specimen.

|               |          | <b>Classified</b> |          |
|---------------|----------|-------------------|----------|
| <b>Actual</b> |          | Negative          | Positive |
|               | Negative | 120               | 1        |
|               | Positive | 0                 | 79       |

| <b>Metric</b>   | <b>Value</b> |
|-----------------|--------------|
| True Positive:  | 79           |
| False Positive: | 1            |
| True Negative:  | 120          |
| False Negative: | 0            |
| Precision:      | 0.988        |
| Recall:         | 1.0          |
| Accuracy:       | 0.995        |

We next validated the performance of the NLP algorithm on cancer-related non-Pathology documents by manually reviewing 100 extracted Gleason scores derived from these documents. This system showed a precision of 97%.

### Concordance of PSA laboratory data with CPT codes.

Total PSA tests were extracted from structured laboratory data in the Corporate Data Warehouse using a hand-curated list of laboratory test names reflecting total PSA measurements. We examined concordance of the structured PSA laboratory data with CPT codes for PSA testing (CPT 84152, 84153, G0103). Among all patients with a PSA result in laboratory data (8.17 M), 97.5% also had a concordant CPT code for PSA testing. Similar results were found among 618,493 patients with PSA results in laboratory data before the date of prostate cancer diagnosis (96.9% with concordant CPT code).

**eFigure 1. Characteristics of 128 Veterans Healthcare Administration facilities included in the primary analysis.** Histograms of (A) population proportion of patients with Black race in each facility in 2012, (B) facility size measured by the number of men with any encounter in each facility in 2012, (C) population proportion of each age group in 2012.

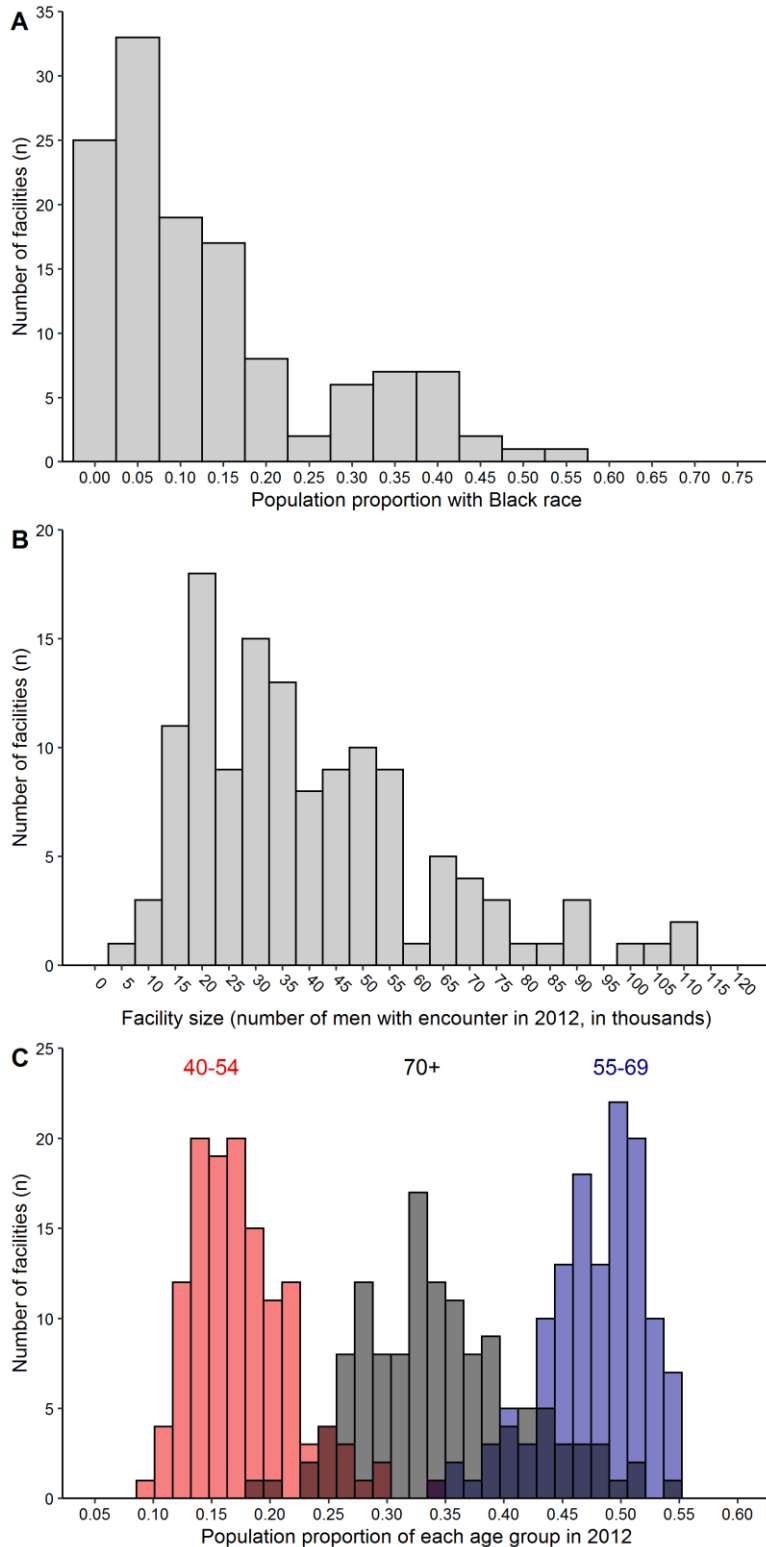

**eFigure 2. Pooled PSA screening, prostate biopsy, and prostate cancer incidence rates.** (A) Pooled PSA screening rates, (B) long-term non-screening rates (representing the proportion of patients without a PSA screening test in the prior 3 years), (C) prostate biopsy rate, (D) non-metastatic prostate cancer incidence rates, (E) proportion of non-metastatic prostate cancer with Gleason 8-10, and (F) metastatic prostate cancer incidence rates. All rates are pooled across 128 Veterans Healthcare Administration facilities. Vertical dotted line represents the year of USPSTF screening guideline publication in 2012. Shaded area represents 95% confidence interval. PSA: Prostate-specific antigen; PCa: prostate cancer; GS: Gleason score.

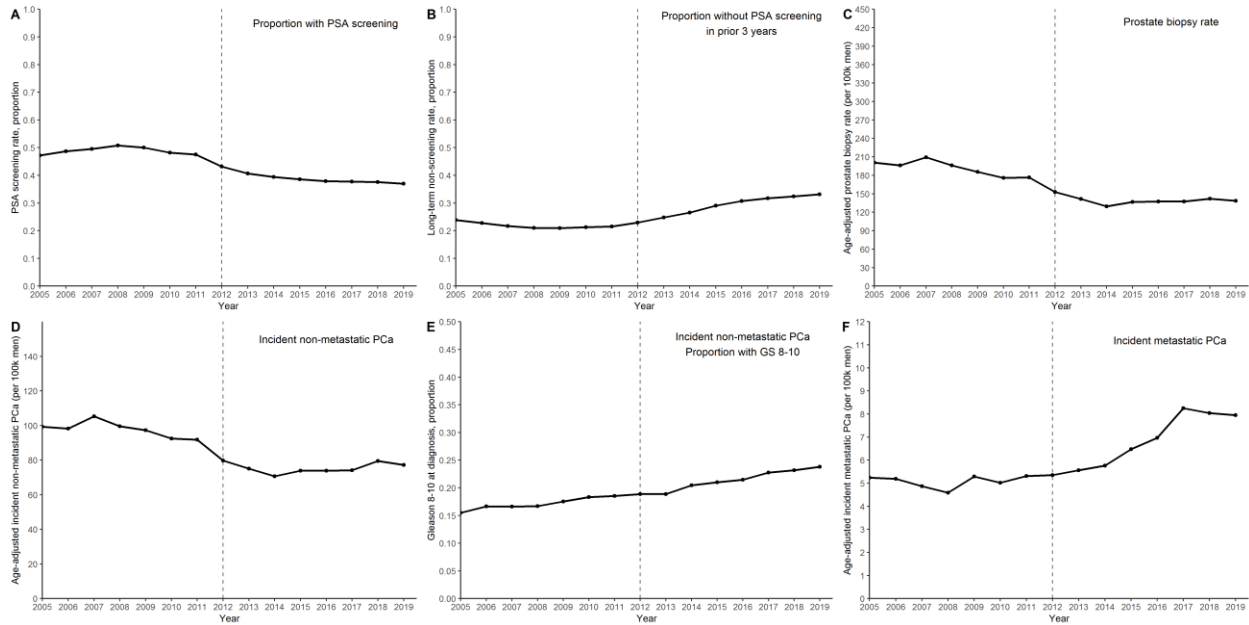

**eTable 1. Screening and diagnosis rates by age group**

| Age group | Year | Men with VHA encounter (n) | Incident mPCa (n) | Screening PSA <sup>a</sup> | No screening PSA in prior 3 years <sup>a</sup> | Prostate biopsy rate <sup>b</sup> | Incident nmPCa with Gleason 8-10 <sup>a</sup> | Incident nmPCa <sup>b</sup> | Incident mPCa <sup>b</sup> |
|-----------|------|----------------------------|-------------------|----------------------------|------------------------------------------------|-----------------------------------|-----------------------------------------------|-----------------------------|----------------------------|
| 40-54     | 2005 | 946,240                    | 53                | 0.398                      | 0.319                                          | 260.6                             | 0.079                                         | 103.1                       | 5.6                        |
|           | 2006 | 891,490                    | 39                | 0.411                      | 0.309                                          | 250.6                             | 0.112                                         | 101.4                       | 4.4                        |
|           | 2007 | 871,965                    | 36                | 0.421                      | 0.299                                          | 256.7                             | 0.107                                         | 117.6                       | 4.1                        |
|           | 2008 | 869,632                    | 32                | 0.437                      | 0.291                                          | 251.9                             | 0.110                                         | 111.5                       | 3.7                        |
|           | 2009 | 902,361                    | 49                | 0.439                      | 0.286                                          | 250.1                             | 0.127                                         | 121.3                       | 5.4                        |
|           | 2010 | 908,969                    | 39                | 0.423                      | 0.287                                          | 244.0                             | 0.103                                         | 114.0                       | 4.3                        |
|           | 2011 | 918,242                    | 51                | 0.414                      | 0.290                                          | 237.4                             | 0.130                                         | 111.1                       | 5.6                        |
|           | 2012 | 923,314                    | 34                | 0.372                      | 0.311                                          | 212.1                             | 0.124                                         | 101.8                       | 3.7                        |
|           | 2013 | 924,061                    | 29                | 0.350                      | 0.338                                          | 184.2                             | 0.120                                         | 91.0                        | 3.1                        |
|           | 2014 | 934,820                    | 37                | 0.338                      | 0.361                                          | 161.5                             | 0.089                                         | 79.2                        | 4.0                        |
|           | 2015 | 928,387                    | 40                | 0.329                      | 0.384                                          | 167.8                             | 0.133                                         | 81.5                        | 4.3                        |
|           | 2016 | 920,822                    | 37                | 0.326                      | 0.397                                          | 166.9                             | 0.137                                         | 86.3                        | 4.0                        |
|           | 2017 | 914,502                    | 45                | 0.327                      | 0.403                                          | 159.5                             | 0.123                                         | 80.2                        | 4.9                        |
|           | 2018 | 921,917                    | 32                | 0.330                      | 0.406                                          | 168.7                             | 0.134                                         | 87.2                        | 3.5                        |
|           | 2019 | 934,615                    | 27                | 0.333                      | 0.409                                          | 159.3                             | 0.121                                         | 80.8                        | 2.9                        |
| 55-69     | 2005 | 1,835,360                  | 303               | 0.578                      | 0.138                                          | 960.0                             | 0.119                                         | 422.9                       | 16.5                       |
|           | 2006 | 1,916,159                  | 315               | 0.594                      | 0.126                                          | 940.0                             | 0.129                                         | 427.1                       | 16.4                       |
|           | 2007 | 1,985,117                  | 319               | 0.602                      | 0.116                                          | 1012.0                            | 0.126                                         | 461.0                       | 16.1                       |
|           | 2008 | 2,052,798                  | 324               | 0.617                      | 0.109                                          | 959.6                             | 0.130                                         | 451.2                       | 15.8                       |
|           | 2009 | 2,181,622                  | 356               | 0.613                      | 0.108                                          | 935.7                             | 0.143                                         | 454.8                       | 16.3                       |
|           | 2010 | 2,289,145                  | 405               | 0.593                      | 0.110                                          | 896.9                             | 0.156                                         | 447.2                       | 17.7                       |
|           | 2011 | 2,407,301                  | 452               | 0.585                      | 0.110                                          | 914.5                             | 0.160                                         | 452.8                       | 18.8                       |
|           | 2012 | 2,483,384                  | 495               | 0.539                      | 0.117                                          | 799.4                             | 0.166                                         | 395.5                       | 19.9                       |
|           | 2013 | 2,510,680                  | 465               | 0.515                      | 0.129                                          | 763.6                             | 0.160                                         | 377.7                       | 18.5                       |
|           | 2014 | 2,530,602                  | 509               | 0.504                      | 0.142                                          | 713.3                             | 0.183                                         | 362.4                       | 20.1                       |
|           | 2015 | 2,501,134                  | 563               | 0.496                      | 0.160                                          | 746.5                             | 0.185                                         | 378.1                       | 22.5                       |
|           | 2016 | 2,440,006                  | 568               | 0.490                      | 0.173                                          | 751.8                             | 0.194                                         | 375.9                       | 23.3                       |
|           | 2017 | 2,303,817                  | 640               | 0.492                      | 0.179                                          | 743.5                             | 0.195                                         | 378.1                       | 27.8                       |
|           | 2018 | 2,111,876                  | 614               | 0.497                      | 0.182                                          | 758.0                             | 0.206                                         | 399.3                       | 29.1                       |
|           | 2019 | 1,936,969                  | 533               | 0.500                      | 0.184                                          | 731.5                             | 0.199                                         | 385.1                       | 27.5                       |
| 70+       | 2005 | 1,896,812                  | 488               | 0.407                      | 0.295                                          | 458.5                             | 0.208                                         | 350.6                       | 25.7                       |
|           | 2006 | 1,906,227                  | 491               | 0.415                      | 0.292                                          | 436.7                             | 0.225                                         | 324.3                       | 25.8                       |
|           | 2007 | 1,877,928                  | 443               | 0.418                      | 0.286                                          | 473.4                             | 0.234                                         | 332.5                       | 23.6                       |
|           | 2008 | 1,836,983                  | 430               | 0.420                      | 0.283                                          | 418.9                             | 0.238                                         | 301.9                       | 23.4                       |
|           | 2009 | 1,826,809                  | 509               | 0.398                      | 0.291                                          | 351.1                             | 0.256                                         | 256.5                       | 27.9                       |
|           | 2010 | 1,791,221                  | 446               | 0.372                      | 0.306                                          | 320.2                             | 0.268                                         | 237.3                       | 24.9                       |
|           | 2011 | 1,776,070                  | 481               | 0.359                      | 0.319                                          | 317.4                             | 0.269                                         | 224.3                       | 27.1                       |
|           | 2012 | 1,768,360                  | 510               | 0.313                      | 0.343                                          | 254.8                             | 0.275                                         | 184.9                       | 28.8                       |
|           | 2013 | 1,772,797                  | 593               | 0.283                      | 0.366                                          | 246.2                             | 0.294                                         | 175.8                       | 33.4                       |
|           | 2014 | 1,804,055                  | 584               | 0.271                      | 0.388                                          | 233.4                             | 0.295                                         | 173.2                       | 32.4                       |
|           | 2015 | 1,850,948                  | 648               | 0.267                      | 0.417                                          | 262.5                             | 0.292                                         | 190.0                       | 35.0                       |
|           | 2016 | 1,929,723                  | 798               | 0.266                      | 0.434                                          | 280.1                             | 0.284                                         | 188.5                       | 41.4                       |
|           | 2017 | 2,093,854                  | 966               | 0.275                      | 0.431                                          | 311.3                             | 0.310                                         | 209.5                       | 46.1                       |
|           | 2018 | 2,306,932                  | 1,076             | 0.282                      | 0.420                                          | 348.1                             | 0.286                                         | 240.2                       | 46.6                       |
|           | 2019 | 2,500,117                  | 1,140             | 0.283                      | 0.417                                          | 359.3                             | 0.301                                         | 239.8                       | 45.6                       |

<sup>a</sup>Expressed as a proportion. <sup>b</sup>Expressed as an age-specific crude rate per 100,000 men.

VHA: Veterans Health Administration; mPCa: metastatic prostate cancer; PSA: Prostate specific antigen; nmPCa: non-metastatic prostate cancer.

**eTable 2. Screening and diagnosis rates by race.**

| Race               | Year    | Men with VHA encounter (n) | Incident mPCa (n) | Screening PSA <sup>a</sup> | No screening PSA in prior 3 years <sup>a</sup> | Prostate biopsy rate <sup>b</sup> | Incident nmPCa with Gleason 8-10 <sup>a</sup> | Incident nmPCa <sup>b</sup> | Incident mPCa <sup>b</sup> |     |
|--------------------|---------|----------------------------|-------------------|----------------------------|------------------------------------------------|-----------------------------------|-----------------------------------------------|-----------------------------|----------------------------|-----|
| Black              | 2005    | 581,810                    | 228               | 0.480                      | 0.200                                          | 379.4                             | 0.151                                         | 244.4                       | 16.2                       |     |
|                    | 2006    | 593,254                    | 214               | 0.504                      | 0.183                                          | 383.4                             | 0.153                                         | 226.5                       | 15.2                       |     |
|                    | 2007    | 613,081                    | 198               | 0.515                      | 0.170                                          | 402.0                             | 0.159                                         | 238.7                       | 13.6                       |     |
|                    | 2008    | 637,147                    | 203               | 0.534                      | 0.161                                          | 369.1                             | 0.161                                         | 223.1                       | 12.7                       |     |
|                    | 2009    | 678,243                    | 242               | 0.531                      | 0.156                                          | 354.0                             | 0.167                                         | 216.4                       | 15.1                       |     |
|                    | 2010    | 707,615                    | 197               | 0.517                      | 0.155                                          | 313.4                             | 0.169                                         | 188.7                       | 12.9                       |     |
|                    | 2011    | 739,812                    | 266               | 0.508                      | 0.156                                          | 319.0                             | 0.173                                         | 192.4                       | 13.6                       |     |
|                    | 2012    | 768,069                    | 272               | 0.465                      | 0.168                                          | 293.2                             | 0.173                                         | 172.3                       | 13.4                       |     |
|                    | 2013    | 791,551                    | 261               | 0.444                      | 0.185                                          | 270.3                             | 0.167                                         | 160.8                       | 12.6                       |     |
|                    | 2014    | 814,079                    | 288               | 0.434                      | 0.202                                          | 243.5                             | 0.183                                         | 145.5                       | 13.0                       |     |
|                    | 2015    | 829,360                    | 360               | 0.429                      | 0.223                                          | 246.9                             | 0.201                                         | 146.7                       | 16.2                       |     |
|                    | 2016    | 842,062                    | 372               | 0.424                      | 0.235                                          | 261.2                             | 0.203                                         | 151.8                       | 16.7                       |     |
|                    | 2017    | 853,654                    | 434               | 0.426                      | 0.240                                          | 261.9                             | 0.196                                         | 152.8                       | 17.8                       |     |
|                    | 2018    | 865,272                    | 435               | 0.428                      | 0.243                                          | 261.8                             | 0.207                                         | 157.2                       | 17.0                       |     |
|                    | 2019    | 875,598                    | 442               | 0.431                      | 0.245                                          | 262.2                             | 0.207                                         | 154.4                       | 16.6                       |     |
|                    | White   | 2005                       | 3,130,797         | 523                        | 0.492                                          | 0.217                             | 188.5                                         | 0.156                       | 90.7                       | 4.6 |
|                    |         | 2006                       | 3,219,393         | 550                        | 0.503                                          | 0.210                             | 179.5                                         | 0.169                       | 88.9                       | 4.7 |
|                    |         | 2007                       | 3,271,043         | 525                        | 0.510                                          | 0.201                             | 190.8                                         | 0.166                       | 93.9                       | 4.3 |
|                    |         | 2008                       | 3,306,806         | 487                        | 0.521                                          | 0.195                             | 177.8                                         | 0.168                       | 87.9                       | 4.0 |
| 2009               |         | 3,434,737                  | 579               | 0.512                      | 0.197                                          | 164.1                             | 0.179                                         | 82.9                        | 4.6                        |     |
| 2010               |         | 3,511,644                  | 597               | 0.491                      | 0.203                                          | 156.9                             | 0.188                                         | 80.1                        | 4.2                        |     |
| 2011               |         | 3,609,880                  | 621               | 0.484                      | 0.206                                          | 154.6                             | 0.191                                         | 77.7                        | 4.5                        |     |
| 2012               |         | 3,672,923                  | 665               | 0.438                      | 0.221                                          | 128.8                             | 0.195                                         | 64.8                        | 4.4                        |     |
| 2013               |         | 3,697,786                  | 724               | 0.411                      | 0.240                                          | 118.0                             | 0.200                                         | 59.8                        | 5.0                        |     |
| 2014               |         | 3,747,411                  | 750               | 0.397                      | 0.260                                          | 108.1                             | 0.214                                         | 56.9                        | 5.0                        |     |
| 2015               |         | 3,752,475                  | 790               | 0.387                      | 0.286                                          | 114.5                             | 0.214                                         | 58.9                        | 5.2                        |     |
| 2016               |         | 3,751,842                  | 899               | 0.379                      | 0.306                                          | 110.3                             | 0.222                                         | 57.5                        | 5.8                        |     |
| 2017               |         | 3,759,630                  | 1,084             | 0.376                      | 0.317                                          | 111.1                             | 0.246                                         | 58.0                        | 6.9                        |     |
| 2018               |         | 3,768,605                  | 1,143             | 0.372                      | 0.325                                          | 115.1                             | 0.244                                         | 62.9                        | 6.7                        |     |
| 2019               |         | 3,771,936                  | 1,109             | 0.364                      | 0.335                                          | 110.8                             | 0.255                                         | 60.5                        | 6.7                        |     |
| Other <sup>c</sup> |         | 2005                       | 245,640           | 44                         | 0.507                                          | 0.210                             | 298.4                                         | 0.142                       | 135.2                      | 5.7 |
|                    |         | 2006                       | 254,355           | 30                         | 0.516                                          | 0.198                             | 265.7                                         | 0.147                       | 119.1                      | 4.1 |
|                    |         | 2007                       | 262,637           | 36                         | 0.520                                          | 0.191                             | 280.4                                         | 0.159                       | 122.8                      | 5.1 |
|                    |         | 2008                       | 272,948           | 47                         | 0.531                                          | 0.185                             | 241.2                                         | 0.156                       | 108.1                      | 5.3 |
|                    | 2009    | 286,218                    | 54                | 0.520                      | 0.185                                          | 212.0                             | 0.157                                         | 101.9                       | 6.2                        |     |
|                    | 2010    | 291,987                    | 61                | 0.497                      | 0.193                                          | 192.0                             | 0.175                                         | 94.2                        | 6.5                        |     |
|                    | 2011    | 300,709                    | 65                | 0.488                      | 0.200                                          | 199.2                             | 0.172                                         | 93.8                        | 6.4                        |     |
|                    | 2012    | 309,375                    | 62                | 0.440                      | 0.218                                          | 163.2                             | 0.187                                         | 81.4                        | 6.2                        |     |
|                    | 2013    | 318,529                    | 66                | 0.414                      | 0.243                                          | 151.0                             | 0.176                                         | 72.5                        | 6.0                        |     |
|                    | 2014    | 331,259                    | 70                | 0.399                      | 0.267                                          | 135.2                             | 0.198                                         | 65.8                        | 6.3                        |     |
|                    | 2015    | 339,603                    | 74                | 0.393                      | 0.291                                          | 141.7                             | 0.217                                         | 73.5                        | 6.9                        |     |
|                    | 2016    | 348,035                    | 98                | 0.388                      | 0.307                                          | 134.6                             | 0.197                                         | 66.6                        | 8.2                        |     |
|                    | 2017    | 357,730                    | 97                | 0.384                      | 0.315                                          | 132.7                             | 0.201                                         | 62.4                        | 8.0                        |     |
|                    | 2018    | 369,673                    | 103               | 0.386                      | 0.321                                          | 138.7                             | 0.232                                         | 69.6                        | 7.9                        |     |
|                    | 2019    | 382,127                    | 116               | 0.380                      | 0.328                                          | 133.6                             | 0.232                                         | 68.2                        | 9.9                        |     |
|                    | Unknown | 2005                       | 720,165           | 49                         | 0.365                                          | 0.371                             | 79.5                                          | 0.181                       | 23.3                       | 1.9 |
|                    |         | 2006                       | 646,874           | 51                         | 0.378                                          | 0.369                             | 77.8                                          | 0.240                       | 23.1                       | 2.1 |

| Race | Year | Men with VHA encounter (n) | Incident mPCa (n) | Screening PSA <sup>a</sup> | No screening PSA in prior 3 years <sup>a</sup> | Prostate biopsy rate <sup>b</sup> | Incident nmPCa with Gleason 8-10 <sup>a</sup> | Incident nmPCa <sup>b</sup> | Incident mPCa <sup>b</sup> |
|------|------|----------------------------|-------------------|----------------------------|------------------------------------------------|-----------------------------------|-----------------------------------------------|-----------------------------|----------------------------|
|      | 2007 | 588,249                    | 39                | 0.384                      | 0.366                                          | 78.6                              | 0.236                                         | 24.7                        | 1.7                        |
|      | 2008 | 542,512                    | 49                | 0.386                      | 0.369                                          | 72.0                              | 0.235                                         | 23.1                        | 2.0                        |
|      | 2009 | 511,594                    | 39                | 0.375                      | 0.376                                          | 67.4                              | 0.229                                         | 20.6                        | 1.6                        |
|      | 2010 | 478,089                    | 35                | 0.358                      | 0.384                                          | 63.3                              | 0.243                                         | 18.2                        | 2.0                        |
|      | 2011 | 451,212                    | 32                | 0.347                      | 0.393                                          | 65.9                              | 0.215                                         | 19.2                        | 1.5                        |
|      | 2012 | 424,691                    | 40                | 0.310                      | 0.411                                          | 53.7                              | 0.241                                         | 16.7                        | 2.2                        |
|      | 2013 | 399,672                    | 36                | 0.287                      | 0.435                                          | 50.8                              | 0.224                                         | 16.8                        | 1.8                        |
|      | 2014 | 376,728                    | 22                | 0.280                      | 0.453                                          | 43.4                              | 0.268                                         | 14.2                        | 1.5                        |
|      | 2015 | 359,031                    | 27                | 0.274                      | 0.480                                          | 47.2                              | 0.175                                         | 15.1                        | 1.9                        |
|      | 2016 | 348,612                    | 34                | 0.272                      | 0.494                                          | 45.8                              | 0.234                                         | 15.6                        | 2.4                        |
|      | 2017 | 341,159                    | 36                | 0.273                      | 0.503                                          | 43.5                              | 0.273                                         | 15.6                        | 2.5                        |
|      | 2018 | 337,175                    | 41                | 0.276                      | 0.505                                          | 49.2                              | 0.252                                         | 19.7                        | 3.0                        |
|      | 2019 | 342,040                    | 33                | 0.274                      | 0.511                                          | 45.4                              | 0.258                                         | 15.3                        | 2.4                        |

<sup>a</sup>Expressed as a proportion. <sup>b</sup>Expressed as a rate per 100,000 men, age-adjusted to the 2000 US standard population. <sup>c</sup>Hispanic and Asian.

VHA: Veterans Health Administration; mPCa: metastatic prostate cancer; PSA: Prostate specific antigen; nmPCa: non-metastatic prostate cancer.

**eTable 3. Results of mixed effects negative binomial regressions for metastatic PCa rates among frequent Veterans Health Administration users.**

| Variable                                                        | Model for PSA screening rate      |           |         | Model for long-term non-screening rate |           |         |
|-----------------------------------------------------------------|-----------------------------------|-----------|---------|----------------------------------------|-----------|---------|
|                                                                 | Incidence rate ratio <sup>a</sup> | 95% CI    | p-value | Incidence rate ratio <sup>a</sup>      | 95% CI    | p-value |
| PSA screening rate or long-term non-screening rate <sup>c</sup> | 0.88                              | 0.83-0.94 | <0.001  | 1.13                                   | 1.02-1.24 | 0.017   |
| Percent Black race <sup>c</sup>                                 | 1.16                              | 1.08-1.26 | <0.001  | 1.18                                   | 1.09-1.28 | <0.001  |
| Calendar year (spline) <sup>d</sup>                             | --                                | --        | <0.001  | --                                     | --        | <0.001  |
| Percent age 70+ <sup>c</sup>                                    | 1.15                              | 1.01-1.30 | 0.041   | 1.13                                   | 0.99-1.29 | 0.07    |
| Availability of novel PET tracers                               | 1.07                              | 0.97-1.18 | 0.2     | 1.06                                   | 0.96-1.17 | 0.3     |
| Usage of MRI pelvis for prostate cancer workup <sup>c,e</sup>   | 0.98                              | 0.94-1.03 | 0.5     | 0.99                                   | 0.94-1.03 | 0.5     |
| Region: Pacific                                                 | (reference)                       | --        | --      | (reference)                            | --        | --      |
| Region: Continental                                             | 0.73                              | 0.53-0.99 | 0.044   | 0.68                                   | 0.49-0.94 | 0.020   |
| Region: Midwest                                                 | 0.90                              | 0.67-1.20 | 0.5     | 0.85                                   | 0.63-1.15 | 0.3     |
| Region: North Atlantic                                          | 0.72                              | 0.54-0.97 | 0.032   | 0.69                                   | 0.51-0.95 | 0.021   |
| Region: Southeast                                               | 0.79                              | 0.57-1.10 | 0.2     | 0.73                                   | 0.51-1.02 | 0.068   |

<sup>a</sup> Coefficients reflect the metastatic prostate cancer incidence rate ratio associated with a unit change in each predictor.

<sup>b</sup> Long-term non-screening rates represent the percentage of men aged 40+ without a prior history of prostate cancer who had not received a PSA test in the prior 3 years.

<sup>c</sup> Reported per 10% increase.

<sup>d</sup> P-value for spline term generated by the likelihood ratio test.

<sup>e</sup> Defined as the proportion of newly-diagnosed prostate cancer cases with MRI pelvis performed within +/- 3 months of the date of diagnosis.

Abbreviations: CI: Confidence interval; PSA: Prostate specific antigen; mPCa: metastatic prostate cancer; PET: positron emission tomography.
